# 1 **Self-reassurance reduces neural and self-report** 2 **reactivity to negative life events**

3 *Jeffrey J. Kim<sup>1,2\*</sup>, Ross Cunnington<sup>1</sup>, & James N. Kirby<sup>1</sup>*

4 <sup>1</sup>Compassionate Mind Research Group, School of Psychology, The University of  
5 Queensland, Brisbane, Queensland, Australia

6 <sup>2</sup>The Centre of Advanced Imaging, The University of Queensland, Brisbane,  
7 Queensland, Australia

8

9 \*Correspondence:

10 Corresponding Author

11 [Jeffrey.kim@uqconnect.edu.au](mailto:Jeffrey.kim@uqconnect.edu.au)

12

13

## **Abstract**

14 Adverse life events are inescapable, but how we relate to setbacks and challenges  
15 matters. Using fMRI, we invited participants to engage in self-criticism and self-  
16 reassurance toward written descriptions of negative life events (mistakes, setbacks,  
17 failures). Our results identify that neural pain and trial-by-trial markers of intensity are  
18 suppressed under conditions of self-reassurance, relative to self-criticism. Engagement  
19 in self-reassurance can therefore reduce the 'sting' of negative life-events, both neural  
20 and self-report.

## 21 Introduction

22 Adverse life events are inescapable, be it a disruption in a career, dissolution of a  
23 relationship, or even a world-wide pandemic. These factors are known to take a toll on  
24 both physical and mental health outcomes<sup>1</sup> which can increase the likelihood of mortality<sup>2</sup>.  
25 These disappointments (e.g., making mistakes), losses (e.g., of hoped love) and fears  
26 (e.g., of rejection) are all triggers to self-criticism<sup>3,4</sup>. Indeed, self-criticism is a common  
27 relating style people use to cope, often resulting in an individual taking the frustration and  
28 anger out on themselves, which compounds the experience of pain psychologically and  
29 neurophysiologically<sup>4</sup>. Whilst research has shown how self-criticism may increase both  
30 self-report<sup>5,6</sup> and neural<sup>7,8</sup> markers of pain, less well known is how self-reassurance - a  
31 compassionately-motivated cognitive relating style - may regulate how the brain responds  
32 toward negative life events.

33 Motivated to explore this timely and open question, we conducted an fMRI  
34 experiment which examined two distinct self-relating styles, self-criticism and self-  
35 reassurance<sup>9</sup>, when participants imagined themselves responding to mistakes, setbacks  
36 or failures. Importantly, we designed our experiment to deliberately tease apart neural  
37 markers of negative emotion, which we refer to as 'neural pain', first by manipulating an  
38 emotional – neutral contrast at the first level of fMRI analysis, and explored how this  
39 activation may differ across self-criticism and self-reassurance. To anticipate our findings,  
40 we associated brain activation of neural pain which differs under conditions of self-  
41 criticism and self-reassurance, specifically showing how self-reassurance can down-  
42 regulate neural markers of negative emotion and pain.

43

44

## Results

45 First, group-level one-sample t-tests of the whole brain contrasts of emotional -  
46 neutral stimuli were conducted overall. We refer to this contrast as neural pain to indicate  
47 an effect of negative emotion, and examined how this effect may differ across self-  
48 criticism and self-reassurance. For neural pain during self-criticism, we observed  
49 activation in the “salience” (midcingulo-insular), “default-mode” (medial frontoparietal),  
50 and the occipital network<sup>10</sup>. Whilst neural pain during self-reassurance recruited activation  
51 in regions such as the medial-prefrontal cortex (MPFC) and visual cortex, we observed  
52 no activation of the salience network as shown under self-criticism. Across both these  
53 contrasts, clusters were formed at a cluster-level threshold of  $p < .05$ , corrected for family-  
54 wise error, with clusters formed with a voxel-level height threshold at  $p < .001$ ,  
55 uncorrected (cluster extent threshold  $K = 144$ ).

56 We next conducted a repeated-measures contrast between self-criticism  
57 (emotional – neutral) minus self-reassurance (emotional – neutral), as a marker of neural  
58 pain which differs between these two mental strategies. Here, we identified brain  
59 activation across bilateral hippocampus (with a cluster which also included left putamen  
60 and left insula), thalamus, ACC, and occipital lobe, revealing neural pain is driven by self-  
61 criticism but not self-reassurance (cluster-level threshold of  $p < .05$ , corrected for family-  
62 wise error, with clusters formed with a voxel-level height threshold at  $p < .001$ ,  
63 uncorrected, with a cluster extent threshold of  $K = 110$ ). A repeated-measures contrast  
64 between self-reassurance (emotional – neutral) minus self-criticism (emotional – neutral)  
65 returned non-significant. Our experimental design is shown in Figure 1, Figure 2 depicts  
66 the whole-brain results, and Figure 3 depicts trial-by-trial markers of intensity (reported in

67 the method section, under 'trial-by-trial markers of intensity'). Tables of thresholded brain  
68 output are available online as supplementary material.

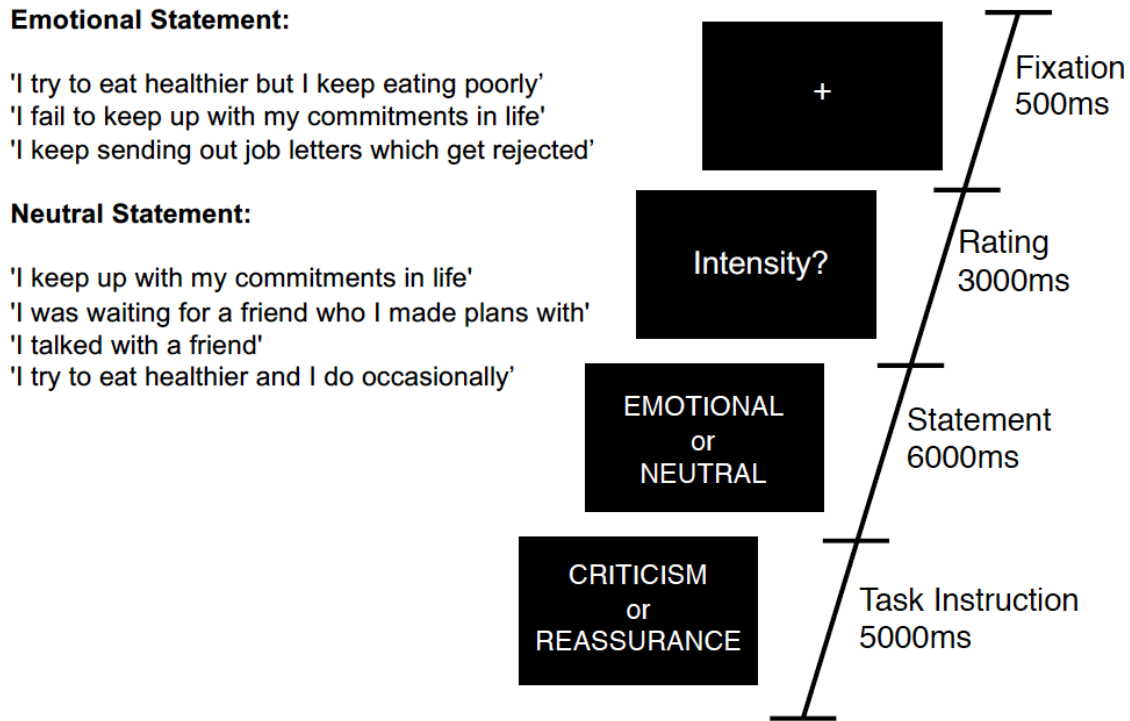

69

70 **Figure 1.** Task diagram for a typical trial. Participants were presented with 30 alternating  
71 trials of emotional or neutral statements which describe a mistake, setback or failure.  
72 Across 8 scan runs of 6 minutes each, participants were asked to engage with these  
73 statements from two different perspectives – four blocks of self-criticism, and four blocks  
74 of self-reassurance (order counterbalanced across participants). Example statements are  
75 presented inset.

76

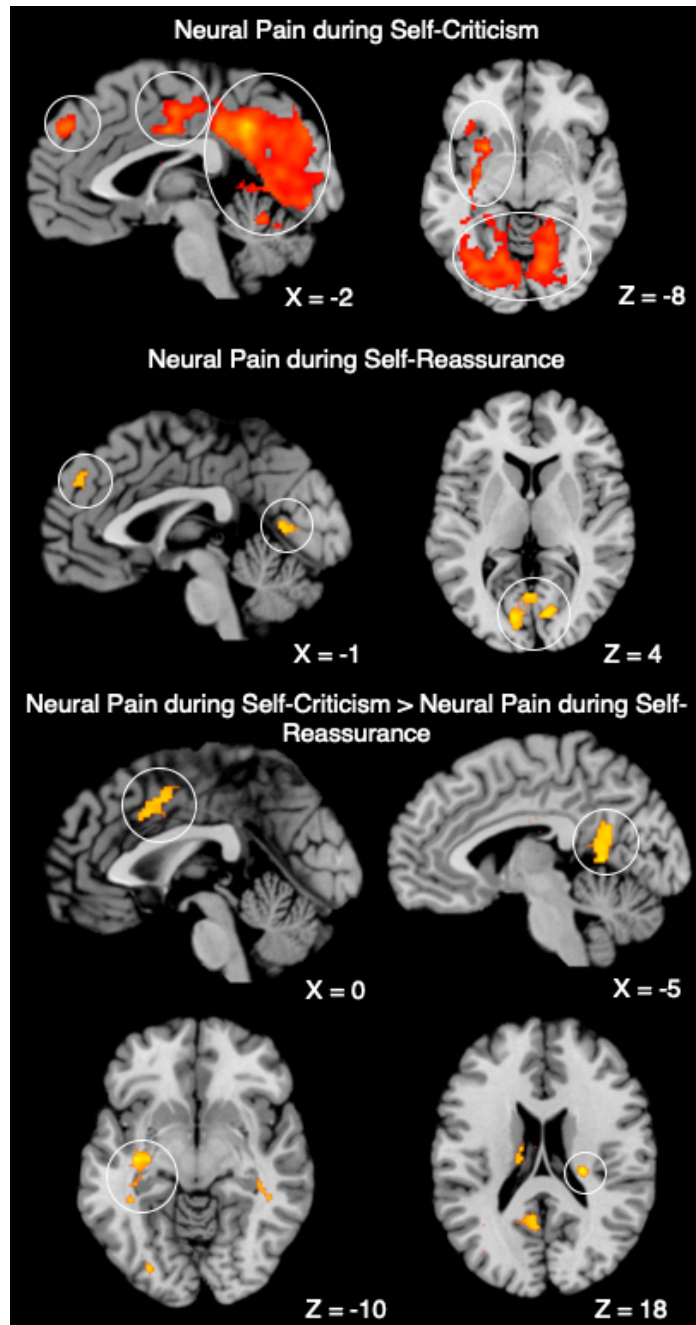

77  
78

79 **Figure 2.** Neural pain across self-criticism and self-reassurance. **Neural Pain during**  
80 **Self-Criticism: Left.** Sagittal image of MPFC (Left Circle), ACC (Middle Circle), and Left  
81 Lingual Gyrus and Cerebellum (Right Circle). **Right.** Axial image of Subcortical Regions  
82 (Top Circle) and Bilateral Visual Cortex (Bottom Circle). **Neural Pain during Self-**  
83 **Reassurance: Left.** Sagittal image of MPFC (Left Circle) and Visual Cortex (Right Circle).  
84 **Right.** Axial image of Visual Cortex. **Neural Pain during Self-Criticism – Neural Pain**  
85 **during Self-Reassurance: Top Left.** Sagittal image of ACC. **Top Right.** Sagittal image  
86 of posterior cingulate. **Bottom Left.** Axial image of left putamen. **Bottom Right.** Axial  
87 image of Right Hippocampus. Coordinates reported in MNI-space.  $N = 40$ .

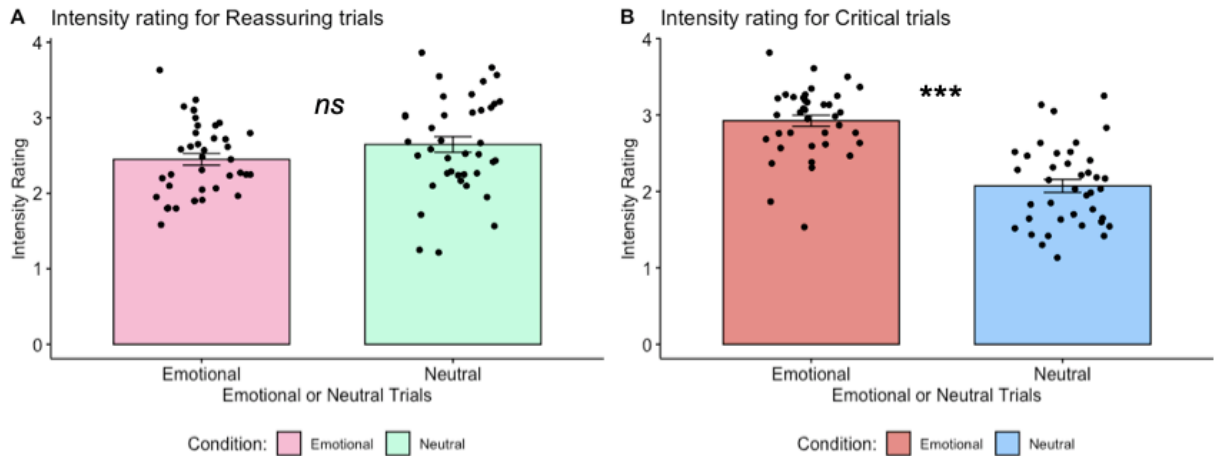

88

89 **Figure 3.** Trial-by-trial ratings of intensity for self-critical and reassuring trials. **Left.**  
90 Intensity ratings for self-reassuring trials, across emotional versus neutral stimuli. One-  
91 sample paired t-test returned non-significant,  $p > .05$ , *ns*. **Right.** Intensity ratings for self-  
92 critical trials, across emotional versus neutral stimuli. One-sample paired t-tests revealed  
93 self-report ratings of intensity for emotional stimuli were greater than neutral stimuli,  $p$   
94  $<.001$ . Error bars indicate standard error.

95

## Discussion

96

Here we investigated neural markers of negative emotion and pain when

97

participants engaged in self-criticism and self-reassurance toward negative life events

98

(i.e., mistakes, setbacks or failures). Across both self-criticism and self-reassurance, our

99

fMRI study revealed common activation across diverse regions such as the visual cortex

100

(associated with mental imagery), salience network (associated with processing pain and

101

threat), and default-mode network (associated with self-referential thought)<sup>10</sup>. Brain

102

activation overall was more extensive for self-critical than self-reassuring trials, even

103

though both contrasts did activate similar regions such as the MPFC and visual cortex.

104

Furthermore, self-reassurance did not activate regions such as the insula, anterior

105

cingulate cortex and amygdala. In addition, self-report ratings of intensity for emotional

106

stimuli were suppressed for self-reassuring versus self-critical trials. Importantly, a contrast

107

of neural pain between self-criticism minus self-reassurance revealed brain activation in

108 regions such as the anterior cingulate cortex, insula and hippocampus. Taken together,  
109 our data show that neural and self-report markers of negative emotion, pain and memory  
110 are suppressed during self-reassurance compared with self-criticism, providing evidence  
111 for how cultivating a reassuring self-relating style can regulate neural markers of pain and  
112 negative emotion.

113         Whilst recruitment of the insula and anterior cingulate cortex have previously been  
114 shown for self-criticism<sup>7,11</sup>, it is important to remark on bilateral hippocampus activation  
115 within the current experiment, which may be an indicator of autobiographical memory  
116 recall<sup>12,13</sup>. Whilst our paradigm instructions were for participants to engage in self-critical  
117 thoughts from the stimuli presented, it is entirely possible that for reference participants  
118 engaged in their own first-person accounts from situations in their own lives<sup>14</sup>. Future  
119 work to explore the role of first-person memory in self-reassurance would be crucial to  
120 examine how it may differ to spontaneous engagement in self-reassurance.

121         To position our results in the broader literature on the neuroscience of empathy  
122 and compassion, we have shown that brain regions for processing negative emotion  
123 toward others<sup>15-17</sup> were shown to not be recruited during compassion to the self.  
124 Specifically, we have shown that neural markers of pain are suppressed during attempts  
125 to be compassionate and reassuring to one's suffering. Our data suggest that  
126 engagement in self-reassurance is a way to reduce the 'sting' of negative life-events, both  
127 neural and self-report, which is a timely finding in our current global environment.

128

129

## Methods:

130

131

132

133

134

135

136

Whilst the program of research within the present paper has been reported on previously, this examined the (neuro)physiological correlates of a brief, two-week compassion training paradigm<sup>4</sup>. Here we focus on the novel whole brain markers of criticism and reassurance which have not been reported previously. As our fMRI method as reported in the previous paper is also the same imaging method used for the present paper, we have reproduced the method for clarity under a CC BY open access licence.

### Participants:

137

138

139

140

141

142

40 participants (Mean age = 22 years, SD = .49, 27 female) took part in the present study. The University of Queensland Health and Behavioural Sciences, Low & Negligible Risk Ethics Sub-Committee approved the experimental protocol, and this project complies with the provisions contained in the *National Statement of Ethical Conduct in Human Research* and complies with the regulations governing experimentation on humans. Participants provided informed and voluntary, written and/or electronic consent.

143

### fMRI Stimuli:

144

145

146

147

148

149

150

151

We created 60 written stimuli in total, consisting of a personal mistake, setback or failure. 30 statements were of emotional valence whereas 30 were neutral (i.e., “I fail to keep up with my commitments in life”, and “I keep up with my commitments in life”, respectively). Our neutral stimuli were created to describe a non-emotive, non-intense control to counterbalance the emotional stimuli set. For both emotional and neutral sets we assessed two metrics, valence (1-5, where 1 = Very Unpleasant) and intensity (1-5, where 1 = Not Intense). Our emotional statements ( $n = 30$ ) were revealed to be sufficiently unpleasant ( $M = 1.89$ ) and intense ( $M = 3.54$ ), with all neutral statements ( $n = 30$ )



152 described as less unpleasant ( $M = 3.80$ ) and comparatively not intense ( $M = 2.34$ ).

### 153 **fMRI Design:**

154       Within the scanner we examined participant's neural responses to the validated  
155 (affective and neutral) written stimuli when engaged in self-criticism and self-reassurance  
156 (Figure 1). After each trial within a block of either self-criticism or self-reassurance,  
157 participants rated how intense their degree of self-criticism or self-reassurance was to  
158 each statement (button-press on an MR-compatible button box which ranged from 1-4,  
159 where 1 = not very intense, and 4, very intense). A typical trial consisted of stimuli  
160 presented for a 6 second duration, followed by a rating of intensity for a 3 second duration,  
161 and an inter-trial-interval of .5 seconds. The first order of instruction for a particular block,  
162 that is, self-reassurance verses self-criticism, was counterbalanced for a total of 8 blocks.  
163 As our focal contrast, we manipulated the emotionality of the statements within scan runs  
164 ("emotive" vs "neutral"), in a counterbalanced order across participants. 30 statements  
165 were quasi-randomized across participants and presented for a total of 30 trials per fMRI  
166 run (~6.5 min total duration) over a total of 8 repeated fMRI runs. Participants were given  
167 10 practice trials of emotional and neutral stimuli, and rated stimuli on intensity.

### 168 **fMRI Acquisition and Pre-Processing:**

169       We collected our fMRI data on a 3-Tesla Siemens Trio MRI scanner utilizing a 64-  
170 channel head-coil. A gradient-echo, echo-planar "fast imaging" (EPI) sequence were used  
171 to acquire functional images, with the following sequence parameters: 60 horizontal slices  
172 (2 x 2-mm in-plane voxel resolution and 2-mm slice thickness plus 10% gap), repetition  
173 time (TR) 1000 ms; echo time (TE) 30 ms. Eight identical fMRI runs of 292 images (6  
174 minutes each) were acquired. A 3D high-resolution, unified and denoised T1-weighted

175 MP2RAGE image across the entire brain was also acquired and used as anatomical  
176 reference for subsequent pre-processing in SPM12 (TR = 4000 ms, TE = 2.93 ms, FA =  
177 6°, 176 cube matrix, voxel size = 1-mm). Functional imaging data were pre-processed  
178 and analyzed using SPM12, implemented in MATLAB. Structural T1-scans were co-  
179 registered to the average of the spatially realigned functional slices. Next, an inbuilt  
180 segmentation routine was applied to register each structural T1-image to the standard  
181 MNI template in MNI space. These transform parameters elicited from segmentation were  
182 subsequently applied to all realigned images, resliced to a 2x2x2-mm resolution and  
183 smoothed with 6-mm full-width-at-half-maximum (FWHM) isotropic Gaussian kernel.

#### 184 **fMRI First and Second-Level Analyses:**

185 For first-level data analysis, block-related neural responses to stimuli were  
186 modelled as 2 separate conditions (all combinations of emotional/neutral, self-  
187 criticism/self-reassurance) and convolved with the canonical hemodynamic response  
188 function (HRF). For group level analysis, whole-brain contrasts of self-criticism  
189 (emotional-neutral) stimuli were reported at a cluster-level threshold of  $p < .05$ , corrected  
190 for family-wise error, with clusters formed with a voxel-level height threshold at  $p < .001$ ,  
191 uncorrected, with a cluster extent threshold of  $K = 144$ . Whole-brain contrasts of self-  
192 reassurance (emotional-neutral) stimuli were reported at a cluster-level threshold of  $p$   
193  $< .05$ , corrected for family-wise error, with clusters formed with a voxel-level height  
194 threshold at  $p < .001$ , uncorrected, with a cluster extent threshold of  $K = 144$ . Whole-brain  
195 repeated-measures contrasts of self-criticism (emotional-neutral) - self-reassurance  
196 (emotional-neutral) stimuli were reported at a cluster-level threshold of  $p < .05$ , corrected

197 for family-wise error, with clusters formed with a voxel-level height threshold at  $p < .001$ ,  
198 uncorrected, with a cluster extent threshold of  $K = 110$ .

199 Brain regions shown to be significant had their anatomical labels identified with the  
200 Automated Anatomical Labelling (AAL) toolbox implemented in SPM12. Next, in order to  
201 examine correlations between the level of neural activation (i.e. difference in response  
202 between emotion verses neutral) and the mindset participants engaged in (i.e. self-  
203 criticism versus self-reassurance), we performed additional region of interest (ROI)  
204 analyses. For each ROI, we identified peak clusters which showed significantly greater  
205 activation overall for emotion vs neutral stimuli, and used these coordinates to extract the  
206 average contrast parameter estimates (i.e. levels of activation, Beta weights) with 5-mm  
207 radius spheres centred on those peaks for each mindset (i.e., self-criticism and self-  
208 reassurance).

209 **Trial-by-trial markers of intensity:**

210 Analysis of participant's mean level of intensity ratings for reassuring trials  
211 (emotional stimuli:  $M = 2.45$ ,  $SD = 0.48$ , neutral statements:  $M = 2.63$ ,  $SD = 0.64$ ) and  
212 critical trials (emotional stimuli:  $M = 2.92$ ,  $SD = 0.45$ , neutral stimuli:  $M = 2.07$ ,  $SD = 0.52$ )  
213 revealed intensity ratings were significantly higher for critical (emotional – neutral) but not  
214 for reassuring (emotional – neutral) trials ( $t(38) = 7.300$ ,  $p < 0.001$ , and  $t(38) =$   
215  $-1.372$ ,  $p = 0.178$ , *ns*, respectively).

216

217 **Acknowledgements:** JNK was supported by a University of Queensland Research and  
218 Teaching fellowship. JJK was supported by an Australian Postgraduate Scholarship.  
219 The authors thank Fernanda L. Ribeiro for helpful feedback and comments on a  
220 manuscript draft.

221  
222 **Author Contributions:** JJK, RC and JNK conceived and designed the experiment;  
223 acquired, analysed and interpreted the data; and wrote the manuscript.

224  
225 **Competing Interests Statement:** The authors declare no competing interests.  
226

## 227 **References**

- 228 1. Solís, C. B. *et al.* Adverse childhood experiences and physiological wear-and-tear  
229 in midlife: Findings from the 1958 British birth cohort. *Proc. Natl. Acad. Sci. U. S.*  
230 *A.* **112**, E738–E746 (2015).
- 231 2. Puterman, E. *et al.* Predicting mortality from 57 economic, behavioral, social, and  
232 psychological factors. *Proc. Natl. Acad. Sci. U. S. A.* **117**, 16273–16282 (2020).
- 233 3. Halamová, J. *et al.* The Factor Structure of the Forms of Self-Criticising/Attacking  
234 & Self-Reassuring Scale in Thirteen Distinct Populations. *J. Psychopathol. Behav.*  
235 *Assess.* **40**, 736–751 (2018).
- 236 4. Kim, J. *et al.* Neurophysiological and behavioural markers of compassion. *Sci.*  
237 *Rep.* **10**, 6789 (2020).
- 238 5. Gilbert, P., Clarke, M., Hempel, S., Miles, J. N. V. & Irons, C. Criticizing and  
239 reassuring oneself: An exploration of forms, styles and reasons in female  
240 students. *Br. J. Clin. Psychol.* **43**, 31–50 (2004).
- 241 6. Cox, B. J. *et al.* Is self-criticism unique for depression? A comparison with social  
242 phobia. *J. Affect. Disord.* **57**, 223–228 (2000).
- 243 7. Lutz, J. *et al.* Altered processing of self-related emotional stimuli in mindfulness  
244 meditators. *Neuroimage* **124**, 958–967 (2016).
- 245 8. Longe, O. *et al.* Having a word with yourself: neural correlates of self-criticism and  
246 self-reassurance. *Neuroimage* **49**, 1849–1856 (2010).
- 247 9. Petrocchi, N., Dentale, F. & Gilbert, P. Self-reassurance, not self-esteem, serves  
248 as a buffer between self-criticism and depressive symptoms. *Psychol.*  
249 *Psychother. Theory, Res. Pract.* **92**, 394–406 (2019).
- 250 10. Uddin, L. Q., Yeo, B. T. T. & Spreng, R. N. Towards a Universal Taxonomy of

- 251 Macro - scale Functional Human Brain Networks How Many Functional Brain  
252 Networks Are A fundamental construct in neuroscience is the definition. *Brain*  
253 *Topogr.* (2019). doi:10.1007/s10548-019-00744-6
- 254 11. Hooley, J. M., Siegle, G. & Gruber, S. A. Affective and Neural Reactivity to  
255 Criticism in Individuals High and Low on Perceived Criticism. *PLoS One* **7**, (2012).
- 256 12. Aly, M. Spotlight Brain Dynamics Underlying Memory for Lifetime Experiences.  
257 *Trends Cogn. Sci.* 1–2 doi:10.1016/j.tics.2020.06.010
- 258 13. McCormick, C., Barry, D. N., Jafarian, A., Barnes, G. R. & Maguire, E. A. vmPFC  
259 Drives Hippocampal Processing during Autobiographical Memory Recall  
260 Regardless of Remoteness. *Cereb. Cortex* 1–16 (2020).  
261 doi:10.1093/cercor/bhaa172
- 262 14. Holland, A. C. & Kensinger, E. A. Emotion and autobiographical memory. *Phys.*  
263 *Life Rev.* **7**, 88–131 (2010).
- 264 15. Zaki, J., Wager, T. D., Singer, T., Keysers, C. & Gazzola, V. The Anatomy of  
265 Suffering: Understanding the Relationship between Nociceptive and Empathic  
266 Pain. *Trends Cogn. Sci.* **20**, 249–259 (2016).
- 267 16. Ashar, Y. K., *et al.* Empathic Care and Distress: Predictive Brain Markers and  
268 Dissociable Brain Systems. *Neuron* **94**, 1263-1273.e4 (2017).
- 269 17. Kim, J. J., Cunnington, R. & Kirby, J. N. The neurophysiological basis of  
270 compassion: An fMRI meta-analysis of compassion and its related neural  
271 processes. *Neurosci. Biobehav. Rev.* **108**, 112–123 (2020).

272

273

274

275

276
