# Supplementary material for: Self-reassurance reduces neural and self-report reactivity to negative life events
Source: bioRxiv or medRxiv preprint supplement (doi:10.1101/2020.09.14.285486), 2020-12-06
Supplement: Supplementary file [file media-1.pdf]

## TABLES

| Area                                    | Cluster peak<br>co-ordinates (XYZ) | Peak<br>t-score | $K_E$ | $P_{FWE-corr}$ |
|-----------------------------------------|------------------------------------|-----------------|-------|----------------|
| <i>Reassurance: Emotional – Neutral</i> |                                    |                 |       |                |
| Left Angular Gyrus                      | -40 -56 36                         | 5.53            | 244   | .001           |
| Left Inferior Parietal                  |                                    |                 |       |                |
| Left Lingual Gyrus                      | -10 -82 4                          | 5.23            | 305   | .001           |
| Left Calcarine                          |                                    |                 |       |                |
| Right Lingual                           |                                    |                 |       |                |
| Right Lingual                           | 12 -80 4                           | 5.07            | 299   | .001           |
| Right Calcarine                         |                                    |                 |       |                |
| Right Cerebellum                        |                                    |                 |       |                |
| Left Frontal Supp Medial                | 2 50 34                            | 4.44            | 147   | .018           |
| Right Frontal Supp Medial               |                                    |                 |       |                |

**Table 1.** Brain regions that showed significantly greater activation for self-reassurance (emotion - neutral). Peak thresholded at FWE,  $p < 0.05$  with  $K = 144$  and coordinates reported in MNI-space. Cluster labelling was used from the AAL toolbox implemented in SPM12.

| Area                                  | Cluster peak<br>co-ordinates (XYZ) | Peak<br>t-score | $K_E$ | $P_{FWE-corr}$ |
|---------------------------------------|------------------------------------|-----------------|-------|----------------|
| <i>Criticism: Emotional – Neutral</i> |                                    |                 |       |                |
| Left Calcarine                        | -4 -52 36                          | 9.21            | 11295 | .001           |
| Right Lingual                         |                                    |                 |       |                |
| Left Lingual                          |                                    |                 |       |                |
| Left Precuneus                        |                                    |                 |       |                |
| Right Calcarine                       |                                    |                 |       |                |
| Left Fusiform                         |                                    |                 |       |                |
| Left Cuneus                           |                                    |                 |       |                |
| Left Middle Cingulate                 |                                    |                 |       |                |
| Right Cuneus                          |                                    |                 |       |                |
| Left Inferior Occipital               |                                    |                 |       |                |
| Right Fusiform                        |                                    |                 |       |                |
| Right Precuneus                       |                                    |                 |       |                |
| Right Posterior Cingulate             |                                    |                 |       |                |
| Left Cerebellum                       |                                    |                 |       |                |
| Right Cerebellum                      |                                    |                 |       |                |
| Vermis                                |                                    |                 |       |                |
| Right Middle Cingulate                |                                    |                 |       |                |
| Right Posterior Cingulate             |                                    |                 |       |                |
| Left Inferior Temporal                |                                    |                 |       |                |
| Vermis                                |                                    |                 |       |                |
| Left Crus 1 Cerebellum                |                                    |                 |       |                |
| Left Supplementary Motor Area         |                                    |                 |       |                |

|                               |            |      |     |      |
|-------------------------------|------------|------|-----|------|
| Left Parahippocampal          |            |      |     |      |
| Left Hippocampus              |            |      |     |      |
| Left paracentral Lobule       |            |      |     |      |
| Right Inferior Occipital      |            |      |     |      |
| Right ParaHippocampal         |            |      |     |      |
| Right Cerebellum Crus1        |            |      |     |      |
| Left Middle Temporal          |            |      |     |      |
| Right Cerebellum 3            |            |      |     |      |
| Right Middle Cingulate        |            |      |     |      |
| Left Putamen                  | -28 19 -14 | 7.45 | 677 | .001 |
| Left Insula                   |            |      |     |      |
| Left Inferior Orbital         |            |      |     |      |
| Left Frontal Inferior Tri     |            |      |     |      |
| Left Hippocampus              |            |      |     |      |
| Left OFCpost                  |            |      |     |      |
| Left Amygdala                 |            |      |     |      |
| Left Inferior Temporal        |            |      |     |      |
| Right Caudate                 | 10 0 22    | 6.02 | 349 | .001 |
| Right Insula                  |            |      |     |      |
| Right Frontal Inferior Oper   |            |      |     |      |
| Right Putamen                 |            |      |     |      |
| R Rolandic Operculum          |            |      |     |      |
| Left Frontal Superior Medial  | -4 46 36   | 5.72 | 145 | .026 |
| Right Frontal Superior Medial |            |      |     |      |
| Left Caudate                  | -8 -18 22  | 5.62 | 350 | .001 |
| Left Thalamus Putamen         |            |      |     |      |
| Left Thalamus LP              |            |      |     |      |
| Left Angular                  | -44 -46 22 | 5.45 | 494 | .001 |
| Left SupraMarginal            |            |      |     |      |
| Left Mid Occipital            |            |      |     |      |
| Left Mid Temporal             |            |      |     |      |
| Left Sup Temporal             |            |      |     |      |
| Left Inferior Parietal        |            |      |     |      |
| Left Precentral               | -30 -28 48 | 5.26 | 625 | .001 |
| Left Postcentral              |            |      |     |      |
| Left Parietal Sup             |            |      |     |      |
| Left Paracentral Lobule       |            |      |     |      |

**Table 2.** Brain regions that showed significantly greater activation for self-criticism (emotion - neutral). Peak thresholded at FWE,  $p < 0.05$  with  $K = 144$  and coordinates reported in MNI-space. Cluster labelling was used from the AAL toolbox implemented in SPM12.

| Area                                                                        | Cluster peak<br>co-ordinates (XYZ) | Peak<br>t-score | $K_E$ | $P_{FWE-corr}$ |
|-----------------------------------------------------------------------------|------------------------------------|-----------------|-------|----------------|
| <i>Criticism (Emotional – Neutral) – Reassurance (Emotional – Neutral):</i> |                                    |                 |       |                |
| Left Putamen                                                                | -36 -16 -10                        | 5.33            | 314   | .001           |
| Left Hippocampus                                                            |                                    |                 |       |                |
| Left Pallidum                                                               |                                    |                 |       |                |
| Left Insula                                                                 |                                    |                 |       |                |
| Right Hippocampus                                                           | 24 -24 18                          | 4.49            | 147   | .001           |
| Left Thalamus VL                                                            | -12 -12 18                         | 4.46            | 158   | .001           |
| Left Caudate                                                                |                                    |                 |       |                |
| Left Thal VPL                                                               |                                    |                 |       |                |
| Left Thal LP                                                                |                                    |                 |       |                |
| Left Precuneus                                                              | -4 -56 4                           | 256             | 256   | .001           |
| Left Calcarine                                                              |                                    |                 |       |                |
| Left Lingual                                                                |                                    |                 |       |                |
| Vermis_4_5                                                                  |                                    |                 |       |                |
| Left Posterior Cingulate                                                    |                                    |                 |       |                |
| Left Cerebellum                                                             |                                    |                 |       |                |
| Left Cuneus                                                                 |                                    |                 |       |                |
| Left Inferior Occipital                                                     | -28 -84 -4                         | 117             |       | .001           |
| Left Middle Occipital                                                       |                                    |                 |       |                |
| Left Middle Cingulate                                                       | 0 14 36                            | 115             |       | .001           |
| Right Middle Cingulate                                                      |                                    |                 |       |                |
| Left Supp Motor Area                                                        |                                    |                 |       |                |
| R Supp Motor Area                                                           |                                    |                 |       |                |
| Left Middle Occipital                                                       | -38 -72 24                         | 127             |       | .001           |
| Left Angular                                                                |                                    |                 |       |                |
| Left Middle Temporal                                                        |                                    |                 |       |                |

**Table 3.** Brain regions that showed significantly greater activation for self-criticism (emotion - neutral) - self-reassurance (emotion - neutral). Peak thresholded at FWE,  $p < 0.05$  with  $K = 110$  and coordinates reported in MNI-space. Cluster labelling was used from the AAL toolbox implemented in SPM12.
